# Supplementary material for: Quantifying Dynamic Flow of Emergency Department (ED) Patient Managements: A Multistate Model Approach
Source: Emerg Med Int. 2020 Dec 3;2020:2059379. doi: 10.1155/2020/2059379 (PMC7737449; doi:10.1155/2020/2059379)
Supplement: Supplementary Materials — Supplementary material I: model specification and likelihood function of a five-state Markov model. Supplementary material II: results of the patient movement rates (per person-hr) estimation from the five-state Markov model. [file 2059379.f1.zip]

Archive with 2 entries (2 files):
- 2059379.f1/Supplementary material I_model specification.docx
- 2059379.f1/Supplementary material II_estimated patient movement rates.docx
