# Supplementary material for: Quantifying Dynamic Flow of Emergency Department (ED) Patient Managements: A Multistate Model Approach
Source: Emerg Med Int. 2020 Dec 3;2020:2059379. doi: 10.1155/2020/2059379 (PMC7737449; doi:10.1155/2020/2059379)
Supplement: Supplementary Materials — Supplementary material I: model specification and likelihood function of a five-state Markov model. Supplementary material II: results of the patient movement rates (per person-hr) estimation from the five-state Markov model. [file 2059379.f1.zip › 2059379.f1/Supplementary material I_model specification.docx]

# Supplementary material I.

**Model Specification and Likelihood Function of a Five-State Markov Model**

In the five-state Markov model proposed in the current study, the transition of states, such as from state *i* to state *j*, is modeled through transition rates, presumed to be an exponential distribution, and governed by a rate parameter, denoted by . It can be shown that the mean sojourn time for staying in state *i* before entering state *j* is the reciprocal of . Because the transitions of different patients can occur between different states simultaneously, transition rates are presented in matrix form. The transition matrix *Q* for the five-state Markov process described above could be expressed as

The zeros in matrix Q indicate that no transition occurred between the two states.

To adjust for the effects of individual covariates on multi-state transition rates, individual covariates were incorporated into the model by setting the transition rate as functions of the above covariates:

where is the baseline transition rate of , is the individual covariate for patient *m,* and is the coefficient for effect X on . Exponentiating the beta coefficient results in a Relative Rate (RR) for effect X.

The corresponding transition probability matrix, which provides the probability of transition during a time *t*, could be derived using Q from a forward Kolmogorov equation, in terms of transition rate parameters. Let represents the probability that a patient will stay in the same state *i* until time *t*. For instance, could be derived and expressed as:

Similarly, could be derived and expressed as:

The likelihood function for transition from state *i* to state *j* at time *t* can be expressed as . Where *s* represents patients, *s*=1,2,…,n, and *c* represents transitions within the same patient, *c*=1,2,…,, and represents the total transition of the *s*th patient, the full likelihood function could then be written as

|  |  |  |
| --- | --- | --- |
